# Supplementary material for: Serum Levels of Transforming Growth Factor Beta 1 in Systemic Lupus Erythematosus Patients
Source: MDPI journal article supplement (doi:10.3390/biom13010073), 2022-12-29
Supplement: s1 [file s1]

**Supplementary Table S1.** Relation of SLICC score items to TGF- $\beta$ 1.

|                                                       | n  | %  | TGF-β1, pg/ml      |        |
|-------------------------------------------------------|----|----|--------------------|--------|
|                                                       |    |    | beta coef. (95%)   | p      |
| Ocular                                                |    |    |                    |        |
| Any cataract ever                                     | 29 | 11 | 1122 (74-2171)     | 0.036  |
| Retinal change or optic atrophy                       | 33 | 12 | 1713 (755-2672)    | 0.001  |
| <i>Points =&gt;1 in the domain</i>                    | 63 | 22 | 875 (128-1623)     | 0.022  |
| Neuropsychiatric                                      |    |    |                    |        |
| Cognitive impairment                                  | 7  | 3  | -104 (-2116-1908)  | 0.92   |
| Seizures requiring therapy for 6 months               | 15 | 5  | 993.2 (-444-2430)  | 0.18   |
| Cerebrovascular accident ever                         | 13 | 5  | 476 (-1074-2027)   | 0.55   |
| Cranial or peripheral neuropathy                      | 5  | 2  | 4321 (1726-6915)   | 0.001  |
| Transverse myelitis                                   | 1  | 0  | 3167 (-2082-8416)  | 0.24   |
| <i>Points =&gt;1 in the domain</i>                    | 40 | 14 | 768 (-152-1688)    | 0.10   |
| Renal                                                 |    |    |                    |        |
| Estimated or measured glomerular filtration rate <50% | 13 | 5  | 2538 (1016-4060)   | 0.001  |
| Proteinuria 3.5 gm/24 hours                           | 7  | 3  | -1204 (-3212-804)  | 0.24   |
| End-stage renal disease                               | 4  | 1  | -126 (-1007-756)   | 0.78   |
| <i>Points =&gt;1 in the domain</i>                    | 28 | 10 | 584 (-474-1642)    | 0.28   |
| Pulmonary                                             |    |    |                    |        |
| Pulmonary hypertension                                | 4  | 1  | 2257 (-373-4887)   | 0.092  |
| Pulmonary fibrosis                                    | 4  | 1  | -1312 (-3952-1327) | 0.33   |
| Shrinking lung                                        | 2  | 1  | -1769 (-5488-1951) | 0.35   |
| Pleural fibrosis                                      | 1  | 0  | -633 (-5890-4625)  | 0.81   |
| Pulmonary infarction                                  | 1  | 0  | -1220 (-6484-4043) | 0.65   |
| <i>Points =&gt;1 in the domain</i>                    | 19 | 7  | -457 (-1700-785)   | 0.47   |
| Cardiovascular                                        |    |    |                    |        |
| Angina or coronary artery bypass                      | 4  | 1  | -685 (-3335-1965)  | 0.61   |
| Myocardial infarction ever                            | 2  | 1  | -1200 (4932-2532)  | 0.53   |
| Cardiomyopathy                                        | 2  | 1  | 4543 (849-8238)    | 0.02   |
| Valvular disease                                      | 9  | 3  | 4216 (2505-5926)   | <0.001 |
| Pericarditis for 6 months, or pericardiectomy         | 2  | 1  | -699 (-4433-3035)  | 0.71   |
| <i>Points =&gt;1 in the domain</i>                    | 23 | 8  | 1442 (316-2569)    | 0.012  |
| Peripheral vascular                                   |    |    |                    |        |
| Claudication for 6 months                             | 3  | 1  | -550 (-3633-2532)  | 0.73   |
| Minor tissue loss (pulp space)                        | 5  | 2  | -1085 (-3478-1309) | 0.37   |
| Significant tissue loss ever                          | 0  | 0  | -                  | -      |
| Venous thrombosis                                     | 14 | 5  | -369 (-1827-1089)  | 0.62   |
| <i>Points =&gt;1 in the domain</i>                    | 34 | 12 | -796 (-1750-157)   | 0.10   |
| Gastrointestinal                                      |    |    |                    |        |

|                                                                                                    |    |    |                      |        |
|----------------------------------------------------------------------------------------------------|----|----|----------------------|--------|
| Infarction or resection of the "terminal" duodenum, spleen,<br>liver or gallbladder for any reason | 22 | 8  | -1078 (-2266-110)    | 0.075  |
| Mesenteric insufficiency                                                                           | 1  | 0  | -1913 (-7175-3349)   | 0.48   |
| Chronic peritonitis                                                                                | 1  | 0  | 978 (-4288-6244)     | 0.72   |
| Stricture or upper gastrointestinal tract surgery ever                                             | 0  | 0  | -                    | -      |
| Pancreatic insufficiency                                                                           | 0  | 0  | -                    | -      |
| <i>Points =&gt;1 in the domain</i>                                                                 | 28 | 10 | -1119 (-2171-68)     | 0.037  |
| Musculoskeletal                                                                                    |    |    |                      |        |
| Muscle atrophy or weakness                                                                         | 3  | 1  | -1247 (-4337-1842)   | 0.43   |
| Deforming or erosive arthritis                                                                     | 40 | 15 | -1446 (-2354-(-539)) | 0.002  |
| Osteoporosis with fracture or vertebral collapse                                                   | 23 | 9  | -671 (-1832-490)     | 0.26   |
| Avascular necrosis                                                                                 | 7  | 3  | -400 (-2440-1641)    | 0.70   |
| Osteomyelitis                                                                                      | 1  | 0  | -1597 (-6930-3736)   | 0.56   |
| Tendon rupture                                                                                     | 4  | 2  | -1944 (-4617-729)    | 0.15   |
| <i>Points =&gt;1 in the domain</i>                                                                 | 89 | 31 | -1548 (-2199-897)    | <0.001 |
| Skin                                                                                               |    |    |                      |        |
| Scarring chronic alopecia                                                                          | 16 | 6  | -191 (-1543-1162)    | 0.78   |
| Extensive scarring or panniculitis                                                                 | 10 | 4  | -1931 (-3605-(-256)) | 0.024  |
| Skin ulceration                                                                                    | 4  | 1  | -370 (-3016-2277)    | 0.78   |
| <i>Points =&gt;1 in the domain</i>                                                                 | 39 | 14 | -635 (-1536-266)     | 0.17   |
| Premature gonadal failure                                                                          | 19 | 7  | 1553 (287-2818)      | 0.016  |
| Diabetes (regardless of treatment)                                                                 | 18 | 6  | 990 (-284-2264)      | 0.13   |
| Malignancy (exclude dysplasia)                                                                     | 11 | 4  | -81 (-1696-1533)     | 0.92   |

SLICC items and domains represent the independent variable.

SLICC: Systemic Lupus International Collaborating Clinics/American Colleague of Rheumatology Damage Index.

Beta coefficients are shown non-standardized

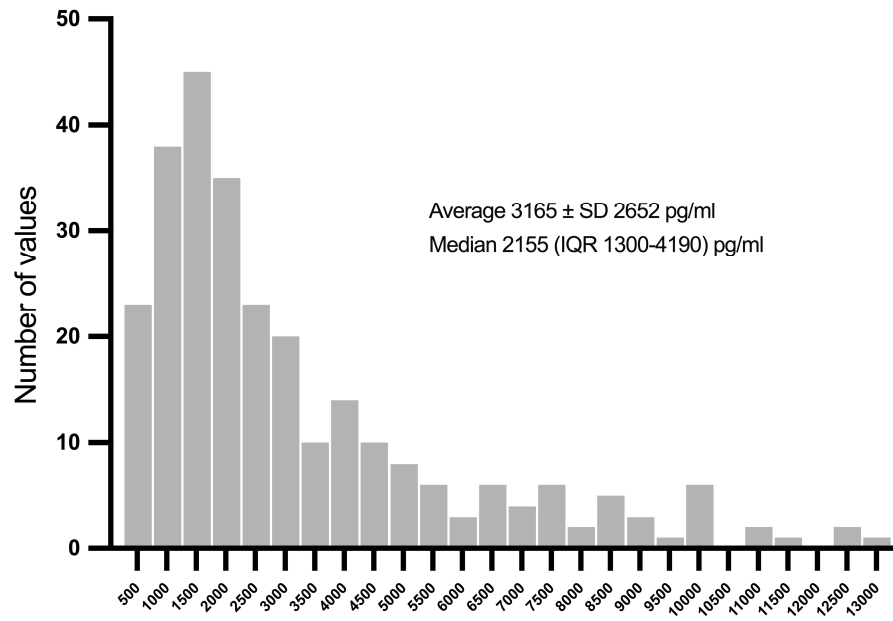

**Supplementary Figure S1.** Histogram of frequency distribution of TGF-β1 serum values in SLE patients.

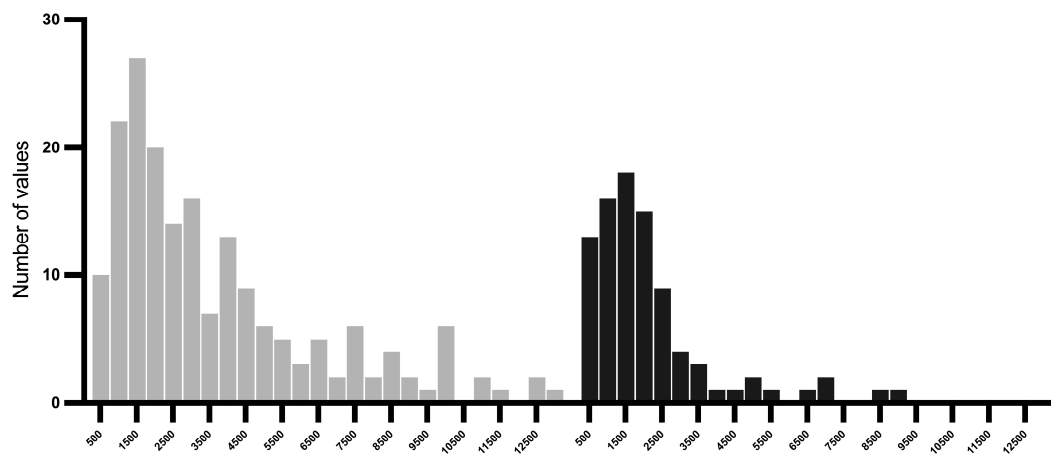

**Supplementary Figure S2.** Histogram of frequency distribution of SLE patients without (left) and with (right) musculoskeletal manifestations (beta coefficient -1548 (-2199-897) pg/ml,  $p < 0.001$ ).
